# Supplementary material
Source: publisher figshare collection journal article supplement (https://acs.figshare.com/ndownloader/files/24031254)

## Achieving non-enzymatic blood glucose sensing by uprooting saturation

Ryan Taoran Wang<sup>a†</sup>, Lory Wenjuan Yang<sup>a†</sup>, Alex Fan Xu<sup>a</sup>, Elton Enchong Liu<sup>a</sup>, and Gu Xu<sup>\*a</sup>

<sup>a</sup> Department of Materials Science and Engineering, McMaster University, 1280 Main St. W, Hamilton, ON, L8S 4L8, Canada

<sup>†</sup>First author, <sup>\*</sup>Corresponding author, E-mail: xugu@mcmaster.ca

Phone: +1 905-525-9140 ext. 27341

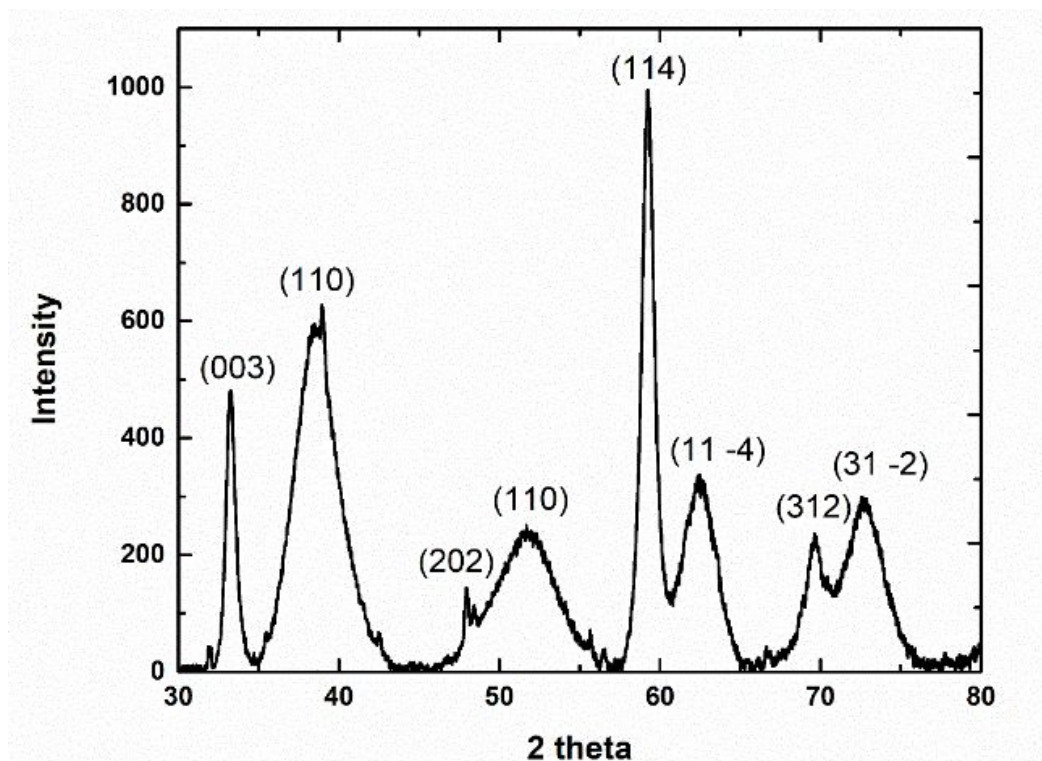

Figure S1. XRD results of  $\text{Ni}(\text{OH})_2$  modified electrode. The peak width was broadened by the disperse particles of  $\text{NiOOH}$ . The peak of (003) and (204) was narrowed by Ni substrate.

Table of content

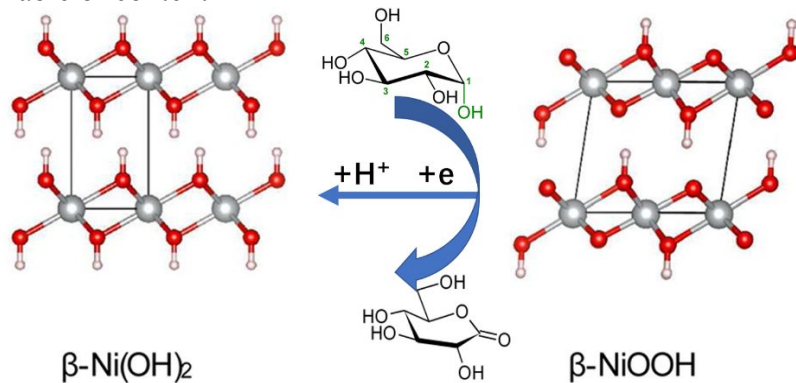

Supplement: Supplementary file 1 [file 24031254]
